# Supplementary material for: Immune Characteristics of LYN in Tumor Microenvironment of Gliomas
Source: Front Cell Dev Biol. 2022 Feb 2;9:760929. doi: 10.3389/fcell.2021.760929 (PMC8847791; doi:10.3389/fcell.2021.760929)
Supplement: Supplementary file 1 [file Table1.XLSX]

## Sheet: IHC
Table S1. Clinical characteristics of Xiangya cohort
Grade	Pathological	Age	Gender
II	Astrocytoma	52	Female
II	Diffuse astrocytoma	38	Male
IV	Glioblastoma multiforme	60	Male
II	Oligodendroglioma	42	Male
III	Diffuse astrocytoma	43	Male
II	Gemistocytic astrocytoma	46	Female
II	Glioma	45	Female
II	Pleomorphic xanthoastrocytoma	10	Male
II	Astrocytoma	45	Female
IV	Glioblastoma multiforme	61	Male
II	Oligodendroglioma	40	Female
II	Astrocytoma	42	Male
IV	Glioblastoma multiforme	57	Male
IV	Glioblastoma multiforme	50	Male
IV	Glioblastoma multiforme	59	Male
III	Anaplastic ependymoma	44	Male
IV	Glioblastoma multiforme	35	Male
III	Anaplastic astrocytoma	35	Female
II	Astrocytoma	36	Male
IV	Glioblastoma multiforme	47	Female
II	Astrocytoma	46	Female
II	Diffuse astrocytoma	61	Male
IV	Glioblastoma multiforme	30	Female
IV	Embryonal carcinoma	20	Male
II	Ganglioglioma	27	Female
IV	Astrocytoma	63	Female
IV	Glioblastoma multiforme	62	Male
III	Anaplastic astrocytoma	62	Female
III	Astrocytoma	50	Male
I	Pilocytic astrocytoma	10	Female
II	Astrocytoma	17	Male
IV	Glioblastoma multiforme	45	Female
IV	Glioblastoma multiforme	50	Female
III	Anaplastic astrocytoma	41	Female
III	Astrocytoma	56	Male
III	Glioma	69	Male
IV	Glioblastoma multiforme	57	Female
IV	Glioblastoma multiforme	61	Female
I	Astrocytoma	35	Male
III	Astrocytoma	10	Female
